# Supplementary material for: Low-Dose Intestinal Trichuris muris Infection Alters the Lung Immune Microenvironment and Can Suppress Allergic Airway Inflammation
Source: PubMed Central journal article supplement (PMC4730564; doi:10.1128/iai.01240-15), 2016-01-25
Supplement: IAI.01240-15_zii999091574so1.pdf [file IAI.01240-15_zii999091574so1.pdf]

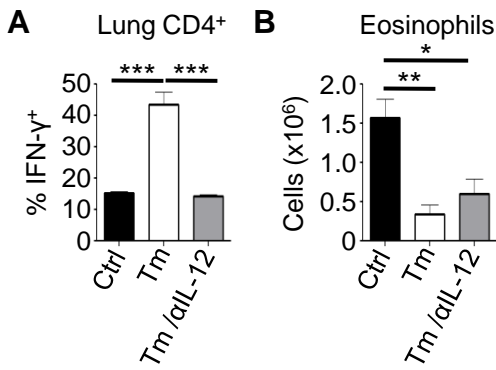

FIG. S1. Neutralization of IL-12 does not reverse *T. muris* infection-mediated protection from papain-induced allergic airway inflammation. (A) *Ex vivo* intracellular staining of IFN- $\gamma$  from lung CD4<sup>+</sup> cells following papain exposure. (B) Quantification of total lung eosinophils following papain exposure. Data are means  $\pm$  SEM, representative of 2 independent experiments, n= 3 mice per experiment (A-B). (Ctrl: papain/IgG1 treated; Tm: *T. muris*-infected papain/IgG1 treated; Tm/ $\alpha$ IL-12: *T. muris*-infected/anti-IL-12 treated/papain treated).

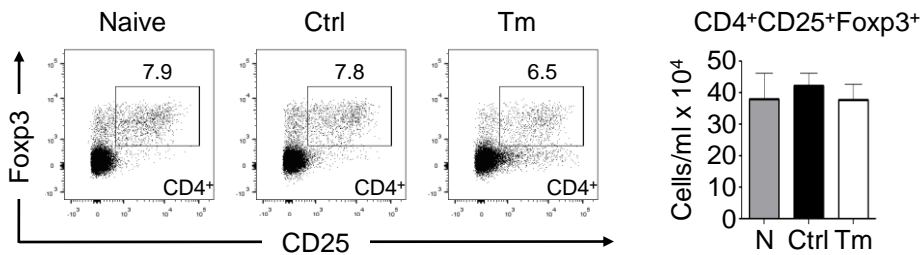

FIG. S2. *T. muris* infection does not affect lung Treg cells. CD4<sup>+</sup>-gated frequencies and absolute numbers of lung Foxp3<sup>+</sup>CD25<sup>+</sup> Treg cells after Tm infection and papain exposure. Data are means  $\pm$  SEM, representative of 2 independent experiments, n= 3 mice per experiment. (N: naive, no papain; Ctrl: papain treated; Tm: *T. muris*-infected papain treated).
